# Supplementary material for: Riverine inputs and phytoplankton community composition control nitrate cycling in a coastal lagoon
Source: Copernicus journal article supplement (doi:10.5194/egusphere-2023-3054), 2024-01-22
Supplement: Supplementary file 1 [file egusphere-2023-3054-supplement.pdf]

# **Riverine inputs and phytoplankton community composition control nitrate cycling in a coastal lagoon**

Mindaugas Zilius<sup>1\*</sup>, Rūta Barisevičiūtė<sup>2</sup>, Stefano Bonaglia<sup>1,3</sup>, Isabell Klawonn<sup>4</sup>, Elise Lorre<sup>1</sup>, Tobia Politi<sup>1,3</sup>, Irma Vybernaite-Lubiene<sup>1</sup>, Maren Voss<sup>4</sup>, and Paul A. Bukaveckas<sup>5</sup>

<sup>1</sup> Marine Research Institute, Klaipeda University, 92294 Klaipeda, Lithuania

<sup>2</sup> State Research Institute, Center for Physical Sciences and Technology, 02300 Vilnius, Lithuania

<sup>3</sup> Department of Marine Sciences, University of Gothenburg, Box 461, 405 30 Gothenburg, Sweden

<sup>4</sup> Department of Biological Oceanography, Leibniz Institute for Baltic Sea Research, 18119 Rostock, Germany

<sup>5</sup> Center for Environmental Studies, Virginia Commonwealth University, Richmond, VA 23284, USA

Corresponding author

\*Corresponding author:

Mindaugas Zilius

Marine Research Institute of Klaipeda University,  
Universiteto al. 17, 92294 Klaipeda, Lithuania.

E-mail.: [mindaugas.zilius@ku.lt](mailto:mindaugas.zilius@ku.lt)

Tel.: +370 46 398818

## Supplementary Material

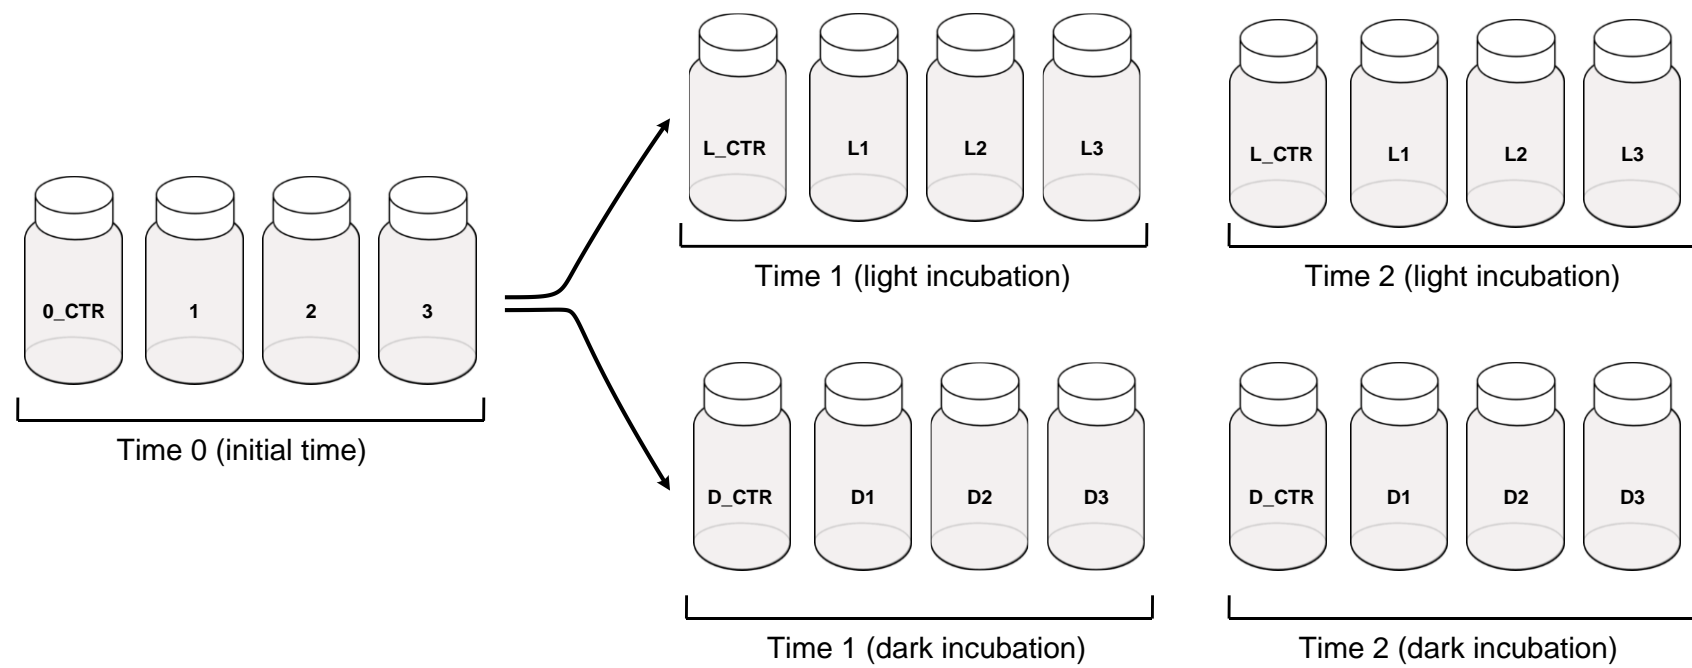

**Fig. S1.** Scheme of the experimental design to measure simultaneous pelagic  $\text{NO}_3^-$  uptake and C-fixation under light (L) and dark (D) conditions. The design included three time points and labelled  $^{15}\text{N}$  and  $^{13}\text{C}$  labelled bottles (1–3). Additionally, unlabeled control (CTR) sample bottles were included for each time point.
